# Supplementary figures and images for: Molecular determinants of Smac mimetic induced degradation of cIAP1 and cIAP2
Source: PubMed Central journal article supplement — Cell Death Differ. 2011 Feb 18;18(8):1376–86. doi: 10.1038/cdd.2011.10 (PMC3172091; doi:10.1038/cdd.2011.10), 2011-02-18

Figure S1  
Darding et al. 2011

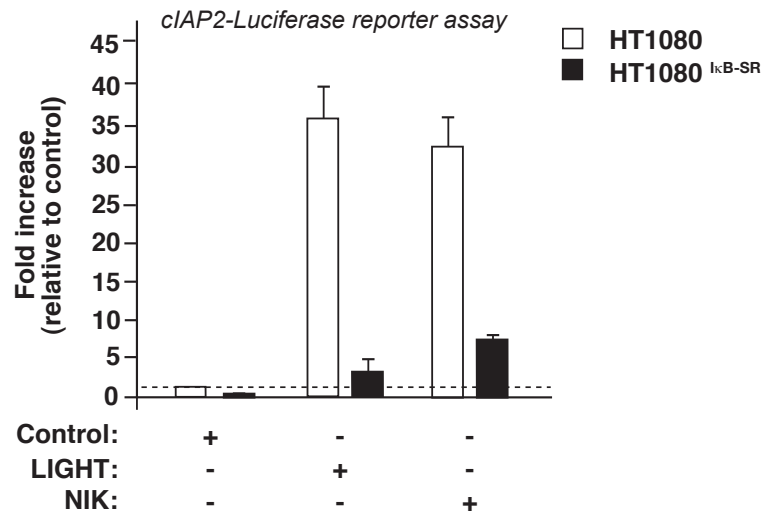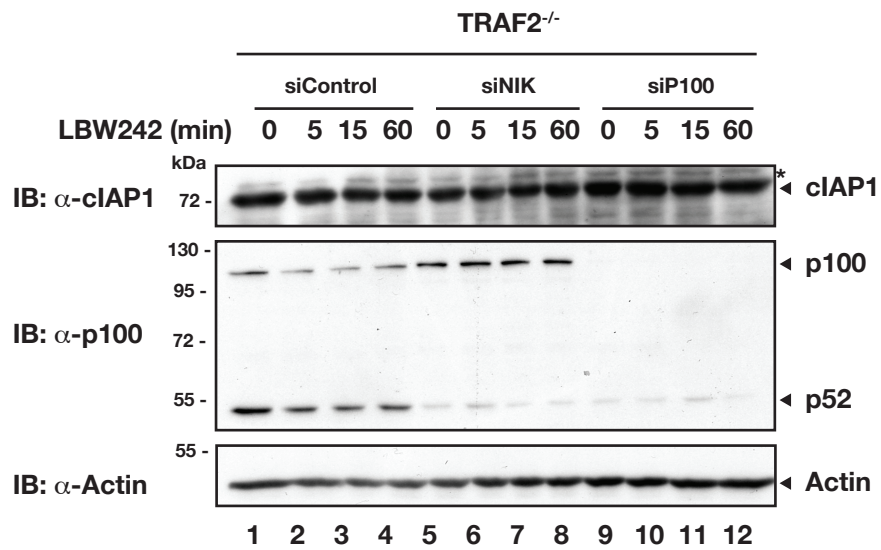

Supplement: cdd201110x1.pdf [file cdd201110x1.pdf]

Supplementary Figure S2  
Darding et al. 2011

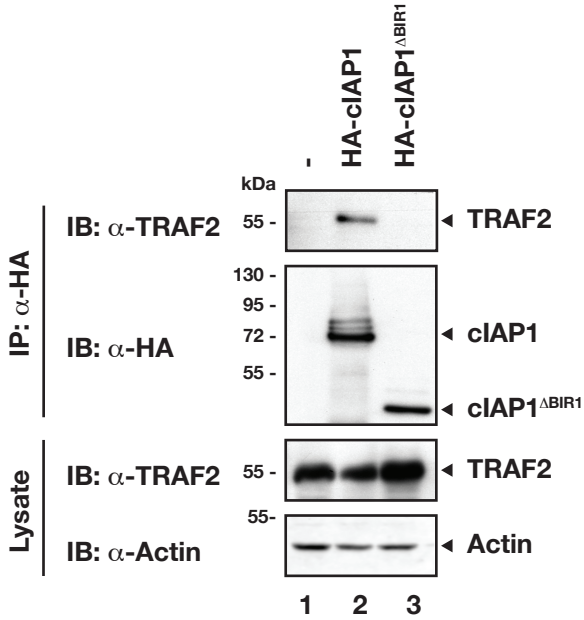

Supplement: cdd201110x2.pdf [file cdd201110x2.pdf]

Supplementary Figure S3  
Darding et al. 2011

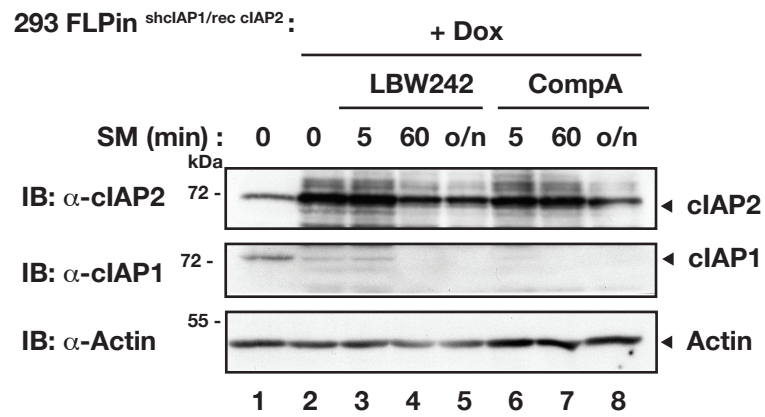

Supplement: cdd201110x3.pdf [file cdd201110x3.pdf]

**Supplementary Figure S4**  
**Darding et al. 2011**

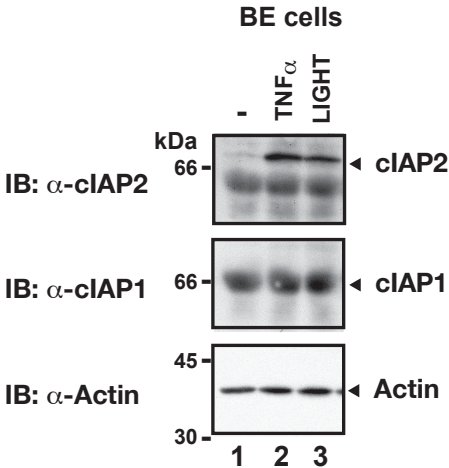

Supplement: cdd201110x4.pdf [file cdd201110x4.pdf]

Supplementary Figure S5  
Darding et al. 2011

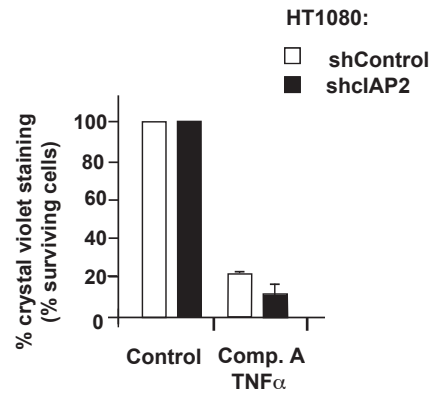

Supplement: cdd201110x5.pdf [file cdd201110x5.pdf]
